# Supplementary figures and images for: Adsorption Performance of Cd(II) by Chitosan-Fe3O4-Modified Fish Bone Char
Source: MDPI journal article supplement (doi:10.3390/ijerph19031260), 2022-01-23

## Supplementary Material

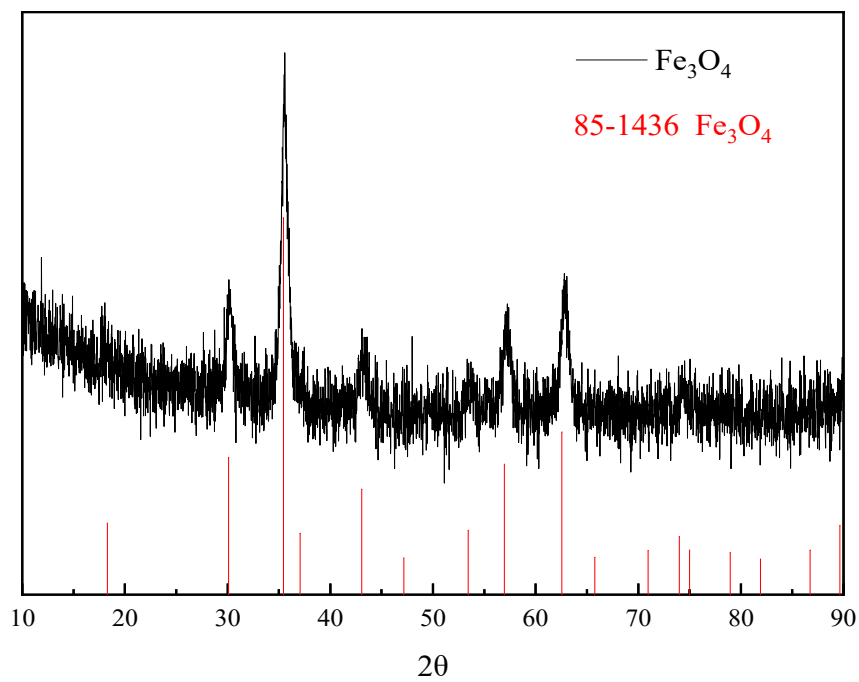

**Figure S1.** XRD pattern of  $\text{Fe}_3\text{O}_4$ .

Supplement: s1 [file s1]
